# Supplementary material for: Insights into the Kinetics Degradation of Bisphenol A by Catalytic Wet Air Oxidation with Metals Supported onto Carbon Nanospheres
Source: MDPI journal article supplement (doi:10.3390/catal11111293), 2021-10-27
Supplement: s1 [file s1]

Supplementary materials

# Insights into the Kinetics Degradation of Bisphenol A by Catalytic Wet Air Oxidation with Metals Supported onto Carbon Nanospheres

Estrella Serra-Pérez \* and Juan García Rodríguez \*

Grupo de Catálisis y Procesos de Separación (CyPS), Departamento de Ingeniería Química y de Materiales, Facultad de Ciencias Químicas, Universidad Complutense de Madrid, Avda. Complutense s/n, 28040 Madrid, Spain

\* Correspondence: estrellaserra@ucm.es (E.S.-P.); jgarcia@ucm.es (J.G.R.); Tel.: +34-91-394-5920 (J.G.R.)

**Table S1.** Representative macroscopic parameters of the hospital wastewater.

| Parameter                                            | Value |
|------------------------------------------------------|-------|
| pH                                                   | 8.5   |
| TC (mg L <sup>-1</sup> )                             | 60    |
| TN (mg L <sup>-1</sup> )                             | 40    |
| Conductivity at 20 °C (mS cm <sup>-2</sup> )         | 1.17  |
| Aromaticity, A <sub>254</sub> (nm)                   | 0.17  |
| NH <sub>4</sub> <sup>+</sup> (mg L <sup>-1</sup> )   | 45    |
| NO <sub>3</sub> <sup>-</sup> (mg L <sup>-1</sup> )   | 0.64  |
| COD (mg L <sup>-1</sup> )                            | 365   |
| Suspended solids concentration (mg L <sup>-1</sup> ) | 138   |
| Phenolic compounds (mg L <sup>-1</sup> )             | 8.9   |
